# Supplementary material for: Direction Finding of Coherent Sources Using a MIMO Array of Triaxial Velocity Sensors
Source: Hindawi journal article supplement (doi:10.1155/2019/7010389), 2019-01-01
Supplement: f1 [file 7010389.f1.pdf]

%%Coherent Source Direction-Finding using a monostatic MIMO array with velocity receive sensors

%% 2019 7 15 Edited by Yuwei Song

```
clc;
clear all;
close all;
M=6;          %transmit antennas number
N=6;          %receive antennas number
snap=100;     % snapshots
monte=100;    %MONTE KALOR
a=[0:M-1]';   %transmit array vector
b=[0:N-1]';   %receive array vector
c=3e8;
f=300e6;
lamda=c/f;    %wavelength
dr=lamda/2 ;  %inter-element spacing at receiver
dt=lamda/2 ;  %inter-element spacing at transmitter

theta=[10 20]*pi/180;phi=[15 25]*pi/180; %the parameters of source
% theta=[80 60]*pi/180;phi=[90 0]*pi/180; %the parameters of source

P=length(theta);          %nmber of source

u=(sin(theta).*cos(phi));
v=(sin(theta).*sin(phi));
w=cos(theta);
p=[u; v ;w];
a_t=exp(j*2*pi/lamda*dt*a*u); %transmitter steering vector    x
a_r=exp(j*2*pi/lamda*dr*b*v); %receiver steering vector      y

A=[kron(p(:,1),kron(a_t(:,1),a_r(:,1))) kron(p(:,2),kron(a_t(:,2),a_r(:,2)))];

s=exp(j*rand(1,snap)*2*pi); %signals vector
s=[s ;s];
tic

SNR=[0:2:30]; %signal to noise ratio
for ii=1:monte
    ii
    noise=(randn(3*M*N,snap)+j*randn(3*M*N,snap))/sqrt(2);
    for kk=1:length(SNR)
        x = 10^(SNR(kk)/20)*A*s+noise; % observation vector
```

```

R_xx = x(1:M*N,:)*x(1:M*N,:)/snap;          % the covariance matrix
R_yy = x(M*N+1:2*M*N,:)*x(M*N+1:2*M*N,:)/snap;      % the covariance matrix
R_zz = x(2*M*N+1:3*M*N,:)*x(2*M*N+1:3*M*N,:)/snap;  % the covariance matrix

```

```

R_x = (R_xx+R_yy+R_zz)/3;
%      R_x=x*x'/snap;
[V,D] = eig(R_x);      % eigenvalue decomposition
[D,index] = sort(diag(D));   %%%
save eig80 D

```

```

en = V(:, index(1:M*N-P));   %%
es = V(:, index(M*N-P+1:M*N)); % noise and signal subspace

```

%% Paper name--- Joint DOD-DOA estimation using combined esprit\_music approach in MIMO radar

```

Es1=es((1:M*N-N),:);%%%% TLS-ESPRIT
Es2= es(N+1:M*N,:);
RzzEs1Es2 = [Es1'; Es2'] * [Es1 Es2];
[EVec, EVal] = eig(RzzEs1Es2);
[EVal, Indx] = sort(diag(EVal).');
for Col = 1 : 2*P
    E(:,Col) = EVec(:,Indx(2*P+1-Col));
end;
E12 = E(1:P,P+1:2*P);
E22 = E(P+1:2*P,P+1:2*P);
[Vt,THETA_u] = eig(-1*E12/E22);
THETA_u=diag(THETA_u);      %%%end estimation u

```

```

for Row=1:M
    frst = (Row-1)*(N-1) + 1;
    last = Row*(N-1);
    EsTop(frst:last,:) = es(frst+(Row-1):last+(Row-1),:);
    EsBot(frst:last,:) = es(frst+Row:last+Row,:);
end;
RzzEs1Es2 = [EsTop'; EsBot'] * [EsTop EsBot];
[EVec, EVal] = eig(RzzEs1Es2);
[EVal, Indx] = sort(diag(EVal).');
for Col = 1 : 2*P
    E(:,Col) = EVec(:,Indx(2*P+1-Col));
end;
E13 = E(1:P,P+1:2*P);
E23 = E(P+1:2*P,P+1:2*P);
[Vr,THETA_v] = eig(-1*E13/E23);

```

```

    THETA_v=diag(THETA_v);    %%%%end estimation v

    pair=abs(inv(Vt)*(Vr));

    u_est = angle(THETA_u)/pi;    %paired processing

    for iii=1:P
        index=find(pair(iii,:)==max(pair(iii,:)));
        v_est(iii)=angle(THETA_v(index))/pi;
    end

    theta_est=asin(sqrt(u_est).^2+v_est.^2))*180/pi;

    phi_est=angle(u_est.+j*v_est)*180/pi;

    err_theta(:,ii,kk)=abs(sort(theta_est,'descend') -sort(theta*180/pi,'descend')).^2;
    err_phi(:,ii,kk)=abs(sort(phi_est,'descend') -sort(phi*180/pi,'descend')).^2;
end
end

err_theta_RMSE=squeeze(sqrt(sum(err_theta,2)/monte));
err_phi_RMSE=squeeze(sqrt(sum(err_phi,2)/monte));

figure;axes('FontSize',14)
semilogy(SNR,err_theta_RMSE(1,:), '*-',SNR,err_theta_RMSE(2,:), '^-',...
    SNR,err_phi_RMSE(1,:), 's-',SNR,err_phi_RMSE(2,:), 'o-',...
    'MarkerSize',9,'LineWidth',1.5);hold on;
xlabel('SNR (dB)');ylabel('RMSE    (\circ)');grid on;box off;
legend('Azimuth of source 1',' Azimuth of source 2',' Elevation of source 1',' Elevation of source
2');grid off
% ylim([2*10^-4 1])

save rlarge err_theta_RMSE err_phi_RMSE

```
